# Supplementary material for: The role of Sp140 revealed in IgE and mast cell responses in Collaborative Cross mice
Source: PubMed Central journal article supplement (PMC8262499; doi:10.1172/jci.insight.146572), 2021-06-22
Supplement: jciinsight-6-146572-s116.pdf [file jciinsight-6-146572-s116.pdf]

# **IgE and mast cell responses in collaborative cross mice: Role of *Sp140***

## **Authors**

Kazufumi Matsushita, Xin Li, Yuki Nakamura, Danyue Dong, Kaori Mukai, Mindy Tsai, Stephen B. Montgomery, Stephen J. Galli.

## **Supplemental Data**

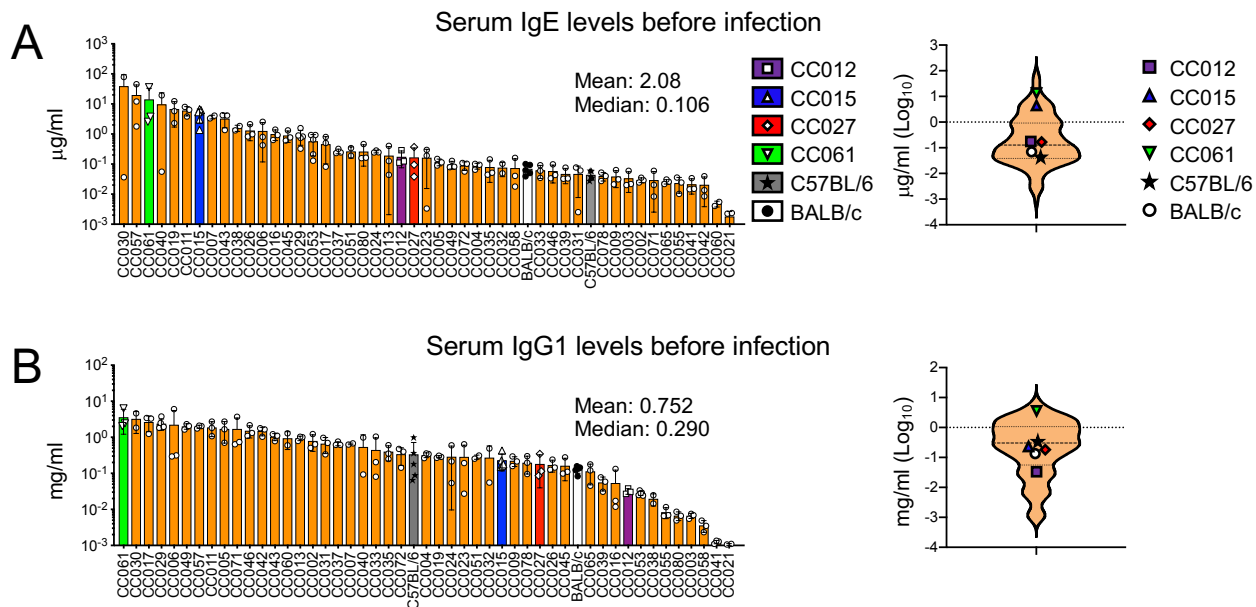

**Supplemental Figure 1. Baseline levels of IgE and IgG1 in CC, C57BL/6J and BALB/c mice.**

Serum samples were obtained from mice a week before the beginning of PCA (**Figure 1**). Summary graphs (left) and violin plots (right) of baseline levels of serum IgE (**A**) and IgG1 (**B**) for each mouse genotype are shown.  $n=1-5$  mice per genotype (see **Supplemental Table 1**) from eight independent experiments. Purple, blue, red, green, black, and white lines, bars and dots represent CC012, CC015, CC027, CC061, C57BL/6J and BALB/c mice, respectively. Barplots with error bars for summary graphs indicate means  $\pm$  SDs, and each dot indicates one mouse. Dashed lines in violin plots indicate 25<sup>th</sup> and 75<sup>th</sup> quartiles and median.

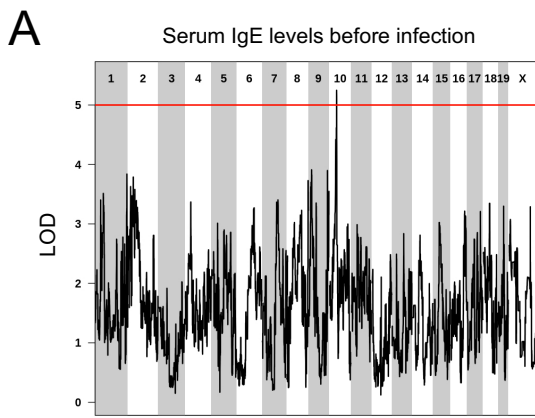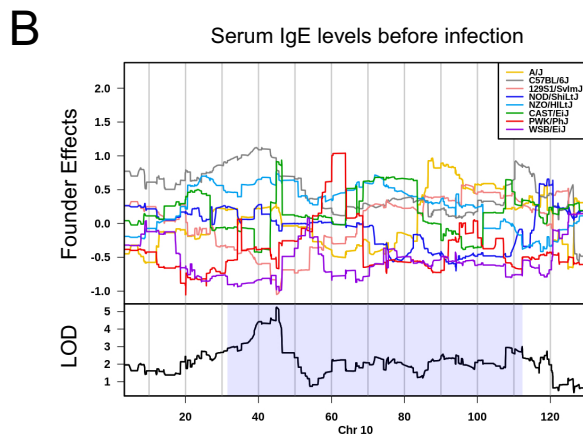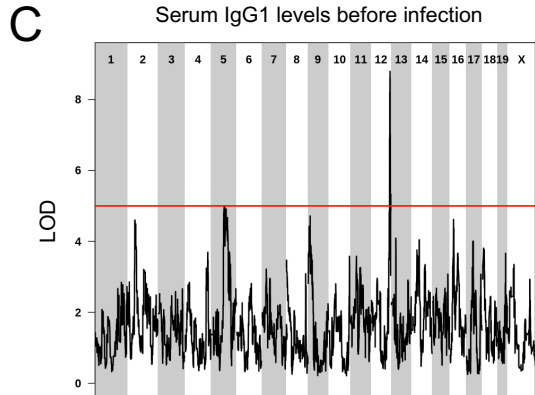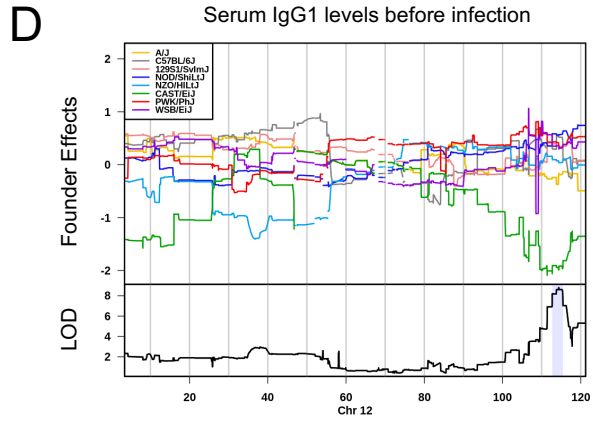

**Supplemental Figure 2. QTL analysis for baseline levels of mouse IgE and IgG1.**

(**A and C**) QTL analysis for chromosomal regions associated with baseline serum levels of IgE (**A**) and IgG1 (**C**). Red lines indicate the LOD score threshold for  $P = 0.05$ . (**B and D**) Analysis for founder effects associated with baseline serum IgE levels within chromosome 10 (**B**) and with baseline serum IgG1 levels within chromosome 12 (**D**).

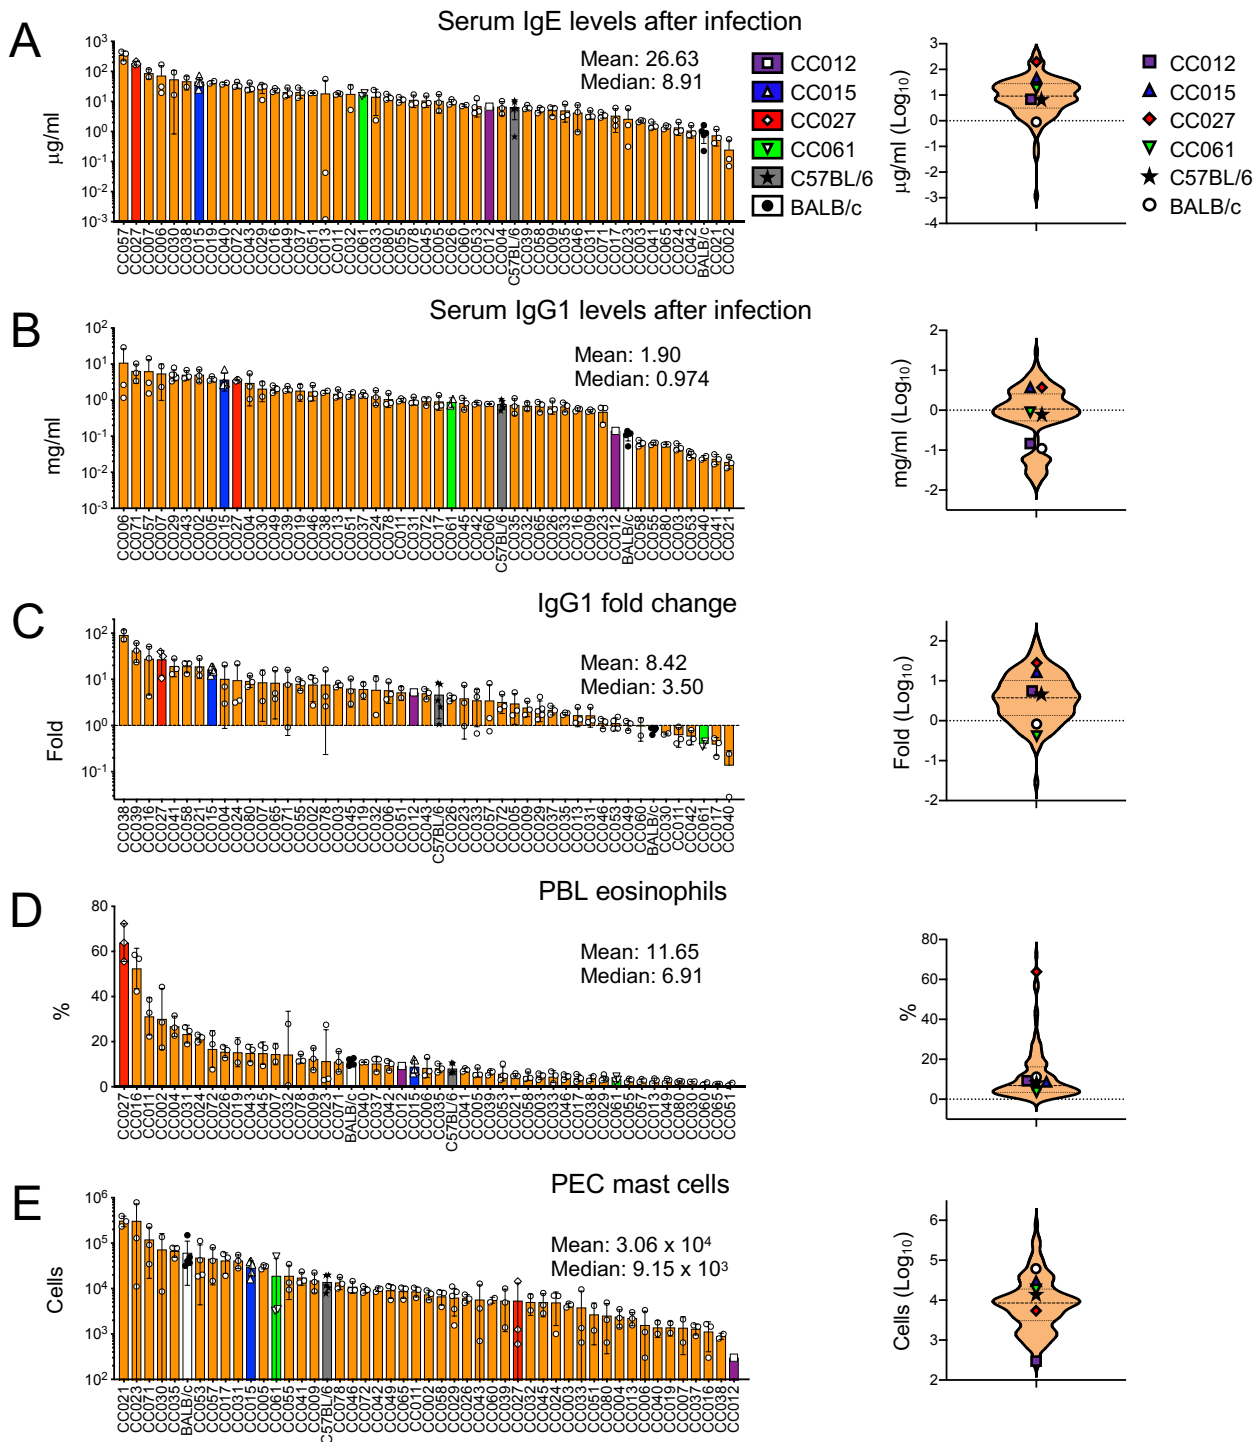

**Supplemental Figure 3. Immunological parameters were assessed after *S. v.* infection in CC, C57BL/6J and BALB/c mice.**

Mice were treated as in **Figure 1A**. All samples were obtained three days after the mice stopped producing *S. v.* eggs. Summary graphs (left) and violin plots (right) of serum IgE levels after *S. v.*-infection (**A**), serum IgG1 levels after *S. v.*-infection (**B**) and the IgG1 fold change from the baseline after infection (**C**), percentage of eosinophils in peripheral blood leucocytes after infection (**D**), and number of mast cells in peritoneal exudate cells (PEC) after infection (**E**) of each genotype of mice are shown. n=1–5 mice per genotype (see **Supplemental Table 1**) from eight independent experiments. Purple, blue, red, green, black, and white lines, bars and dots represent CC012, CC015, CC027, CC061, C57BL/6J and BALB/c mice, respectively. Barplots with error bars for summary graphs indicate means  $\pm$  SDs, and each dot indicates one mouse. Dashed lines in violin plots indicate 25<sup>th</sup> and 75<sup>th</sup> quartiles and median.

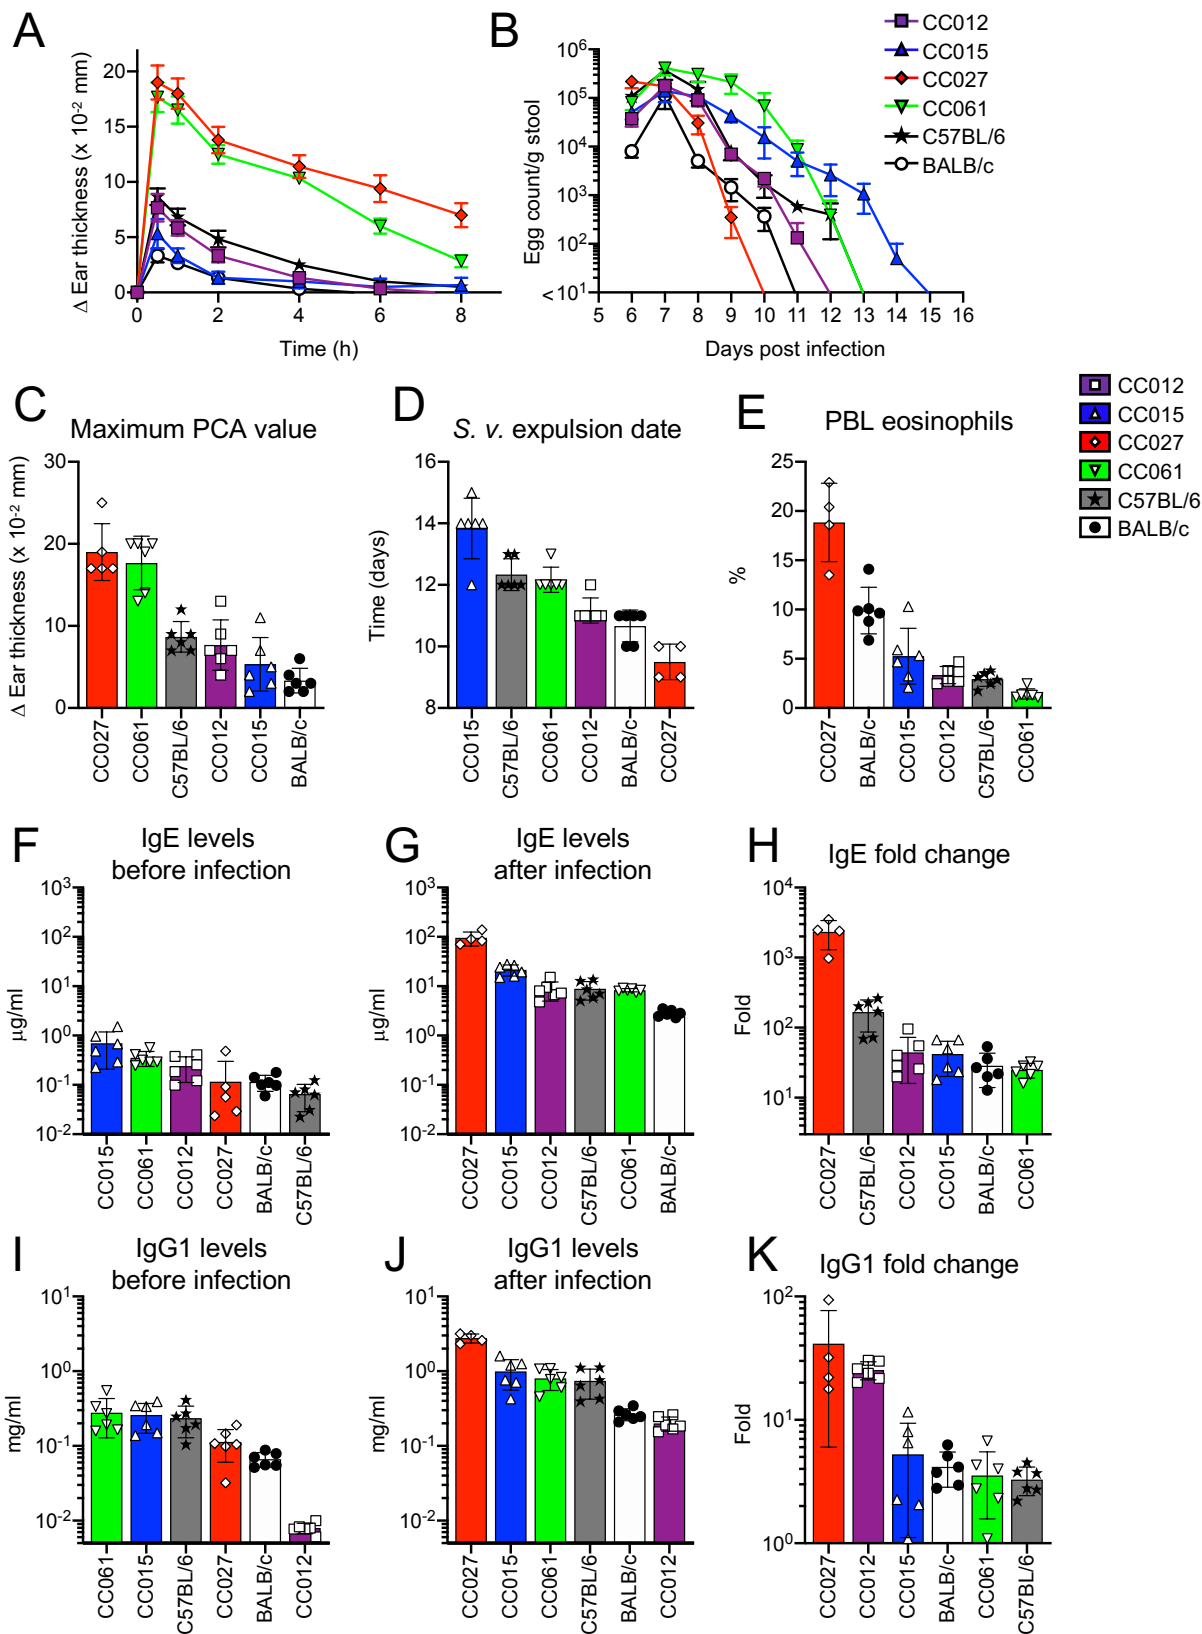

**Supplemental Figure 4. PCA intensity and immunological parameters were evaluated before and after *S. v.* infection in CC, C57BL/6J and BALB/c mice.**

CC012, CC015, CC027, CC061, C57BL/6J and BALB/c mice were treated as in **Figure 1A**. (A) PCA reaction. Mean changes ( $\Delta$ ) in ear thickness over time after intravenous injection in each genotype of mice are shown. (B) *S. v.* infection. Mean *S. v.* egg numbers excreted after worm inoculation in each genotype of mice are shown. (C to K) Summary graphs of the maximum values of PCA (C), *S. v.* expulsion date (D), percentage of eosinophils in peripheral blood leucocytes after infection (E), serum IgE levels before (F) and after (G) *S. v.*-infection, and the IgE fold change after infection (H), serum IgG1 levels before (I) and after (J) *S. v.*-infection, and the IgG1 fold change after infection (K). All samples in E, G and J were obtained three days after the mice had stopped producing *S. v.* eggs. Purple, blue, red, green, black and white lines and bars represent CC012, CC015, CC027, CC061, C57BL/6J and BALB/cJ, respectively. Barplots with error bars indicate means  $\pm$  SDs, and each dot indicates one mouse. n=4 for CC027 and n=6 for other genotypes from three independent experiments.

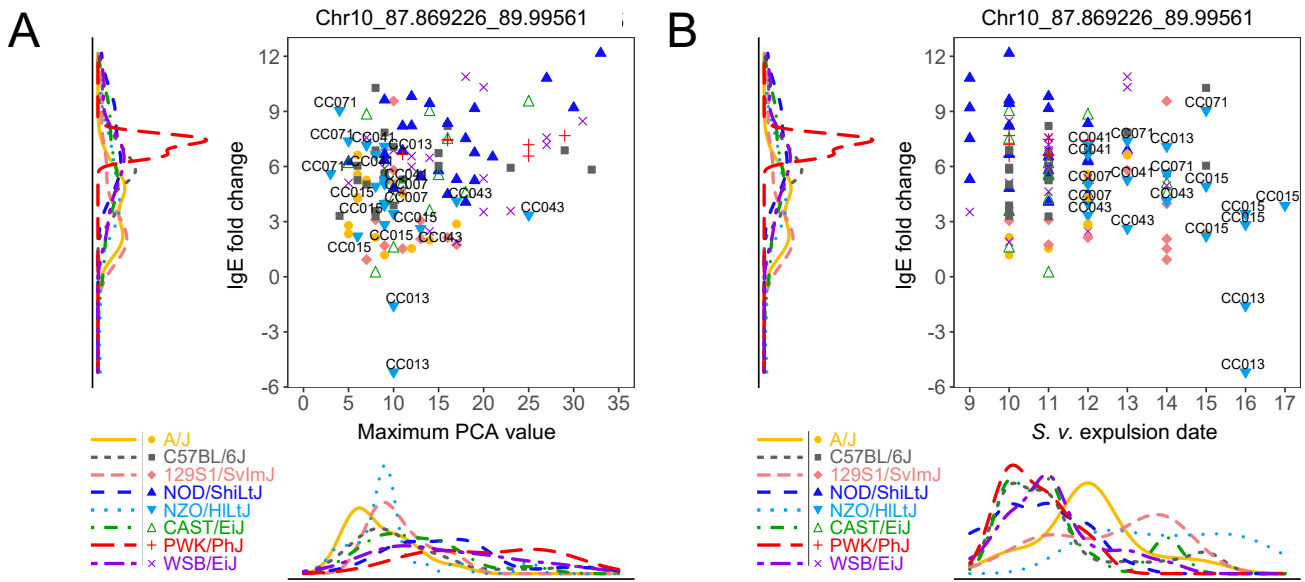

**C**

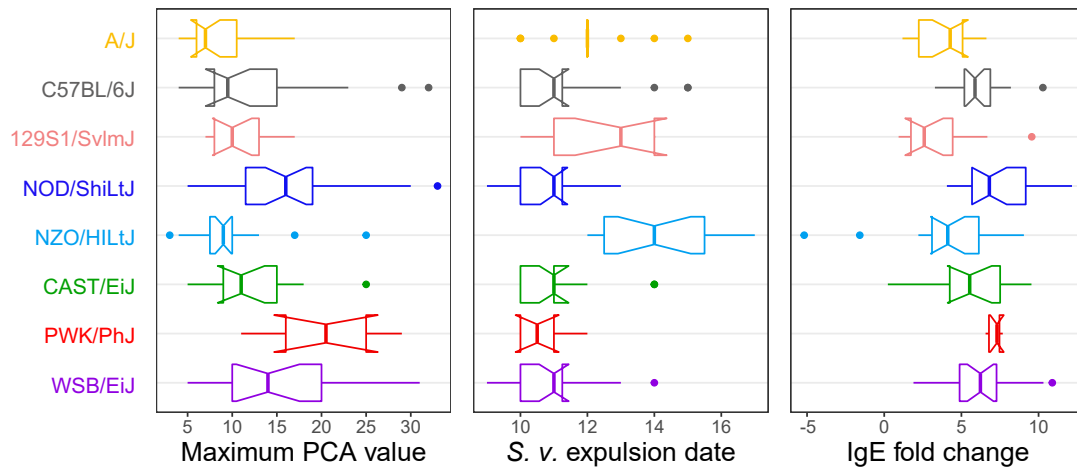

**D**

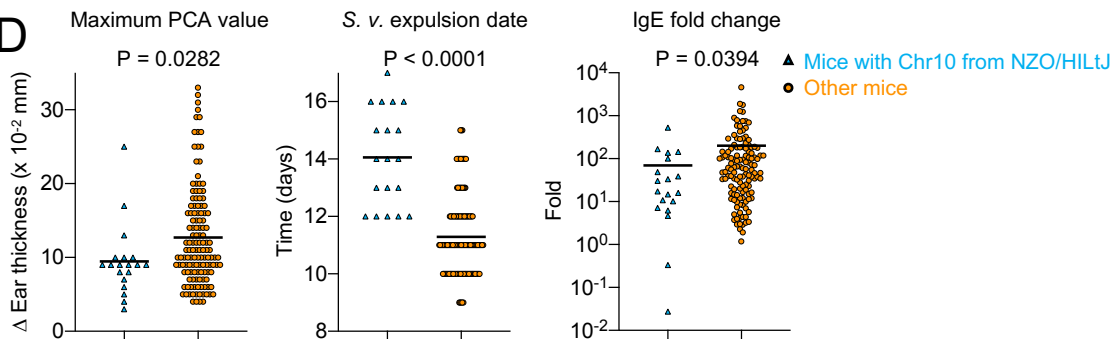

**Supplemental Figure 5. Chromosome 10, region 79.4–94.0 Mb, from NZO/HILtJ associates with weaker MC responses in CC mice.**

(A and B) Inter-correlation among maximum PCA value, *S. v.* expulsion date, and IgE-fold change in CC mice as in Figure 2. The founder strain of each CC mouse's chromosome 10, 87.9–90.0 Mbp are indicated in eight different colors (yellow; A/J, brown; C57BL/6J, pink; 129S1/SvImJ, dark blue; NOD/ShiLtJ, light blue; NZO/HILtJ, green; CAST/EiJ, red; PWK/PhJ, purple; WSB/EiJ). (C) CC mice were classified into eight groups according to the founders of their chromosome 10, 87.9–90.0 Mbp. Notched boxplots of maximum PCA value, *S. v.* expulsion date, and IgE-fold change of each group are shown. (D) Mice were divided into two groups according to their chromosome 10, 87.9–90.0 Mbp being from NOD/ShiLtJ (light blue) or not (orange). Dotplots of maximum PCA value, *S. v.* expulsion date, and IgE-fold change of each group are shown. Each dot indicates one mouse and the bars indicate the means. P values were determined by Student's *t* test.

**A** C57BL/6 (IgE only) vs CC027 (IgE only)

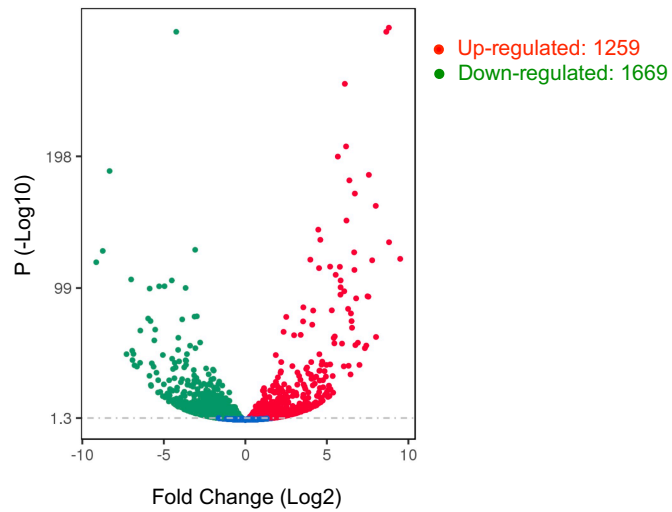

**B** C57BL/6 (IgE+Ag) vs CC027 (IgE+Ag)

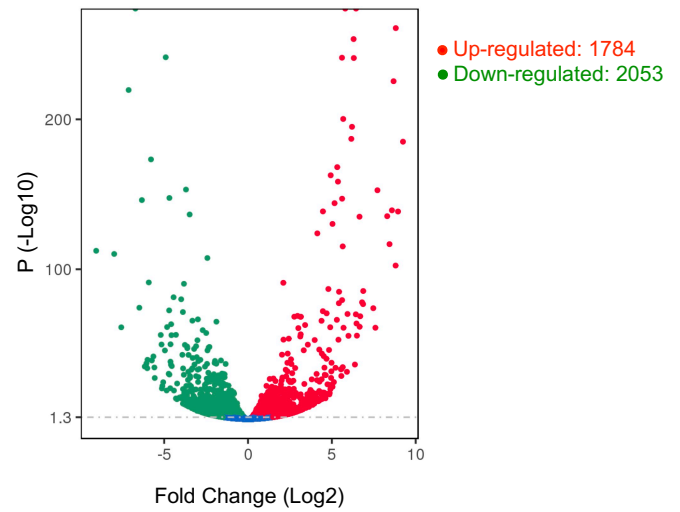

**Supplemental Figure 6. BMCMCs of CC027 and C57BL/6J mice differ in RNA expression profiles.**

BMCMCs from CC027 and C57BL/6J mice were prepared and stimulated as in **Figure 4**. MCs were sensitized with mouse anti-DNP-IgE mAb (1  $\mu\text{g}/\text{mL}$ ) overnight, then stimulated with (IgE+Ag) or without (IgE only) DNP-HSA (20  $\text{ng}/\text{mL}$ ) for 1 hour. Volcano plots of differentially expressed genes between BMCMCs from CC027 and C57BL/6J mice stimulated without (**A**; IgE only) or with (**B**; IgE+Ag) DNP-HSA.

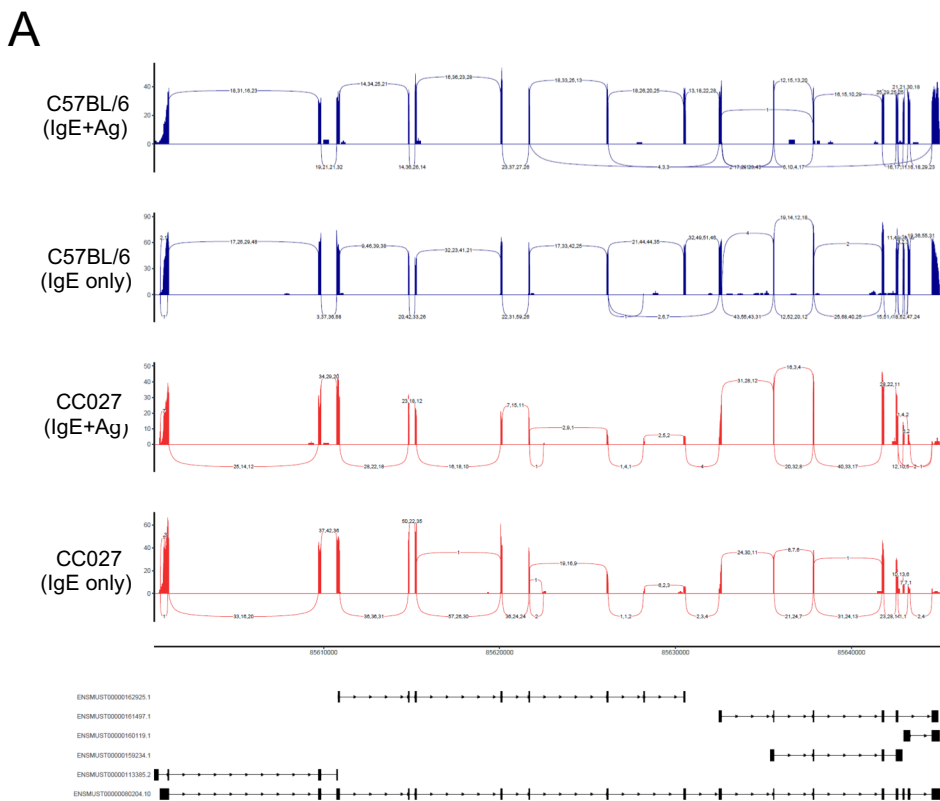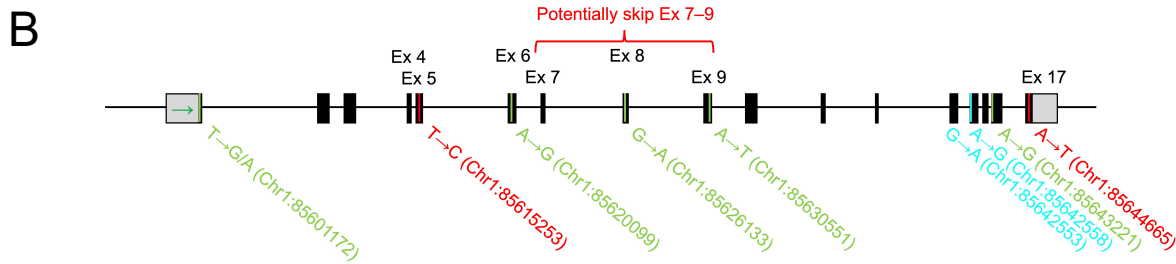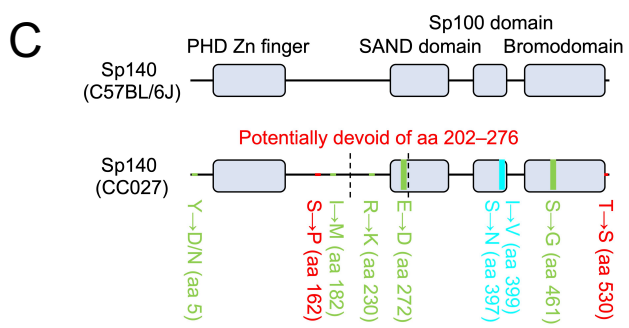

**Supplemental Figure 7. CC027 mice express *Sp140* devoid of Ex 7-9.**  
**(A)** Sashimi plots showing alternative splicing pattern for the entire *Sp140* in C57BL/6J (blue) and CC027 (red) mice. **(B)** Schematic representation of the mouse *Sp140* gene. Nine missense SNPs (red; NOD/ShiLtJ-specific SNPs, green; SNPs not specific for NOD/ShiLtJ, light blue, newly identified SNPs) on CC027 *Sp140* are indicated. **(C)** Schematic representation of the mouse *Sp140* protein. The expected *Sp140* protein expressed in C57BL/6J and CC027 mice, and the point mutations in CC027 mice caused by SNPs, are shown.



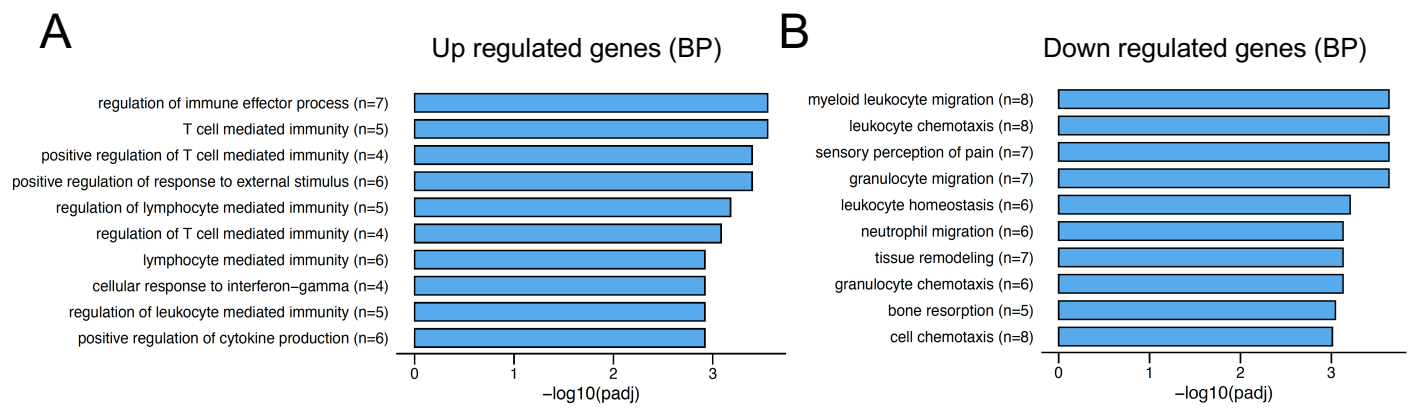

**Supplemental Figure 8. *Sp140*-controlled genes contribute to immune-related processes in CC027 BMCMCs.**

GO biological processes of up- (A) and down- (B) regulated *Sp140*-controlled genes (mouse macrophages) in non-stimulated CC027 BMCMCs. Genes extracted in **Figure 6I** were subjected to GO pathway analysis.

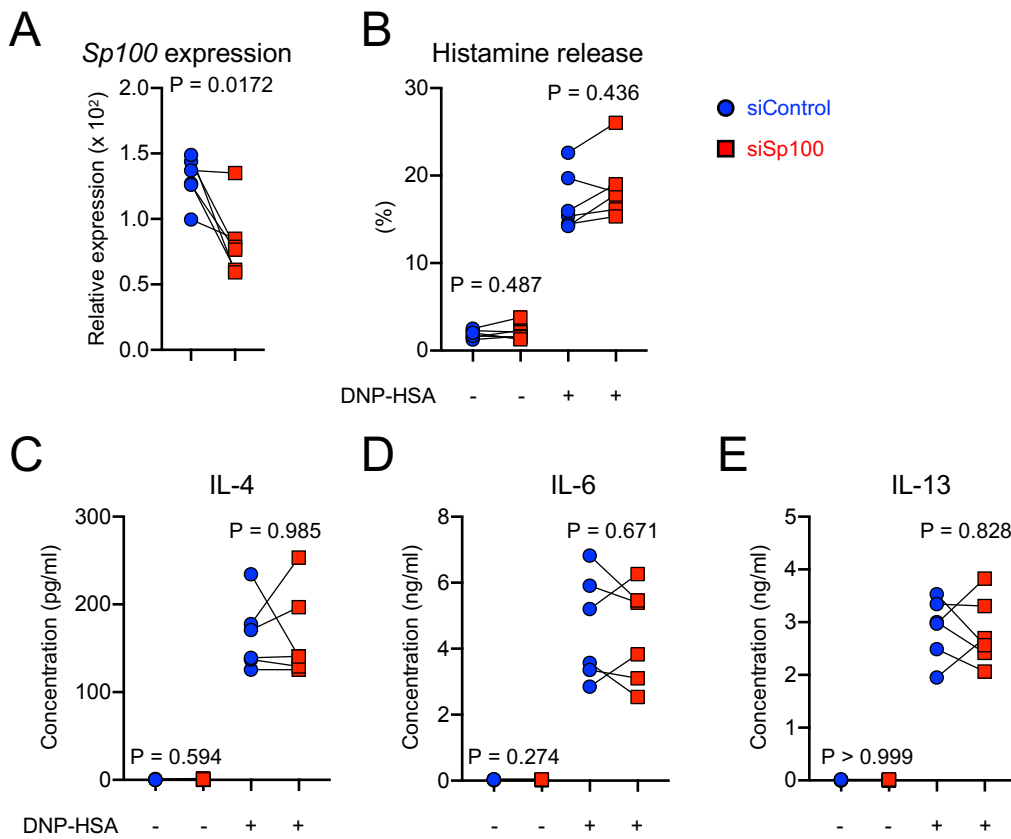

**Supplemental Figure 9. *Sp100* is dispensable for IgE-dependent MC responses.**

Bone marrow cells from C57BL/6J mice were cultured with IL-3 for 6–7 weeks to generate BMCMCs. Control siRNA or siRNA against *Sp100* was transfected into the cells. **(A)** mRNA level for *Sp100* twenty-four hours after the siRNA transfection was determined by quantitative PCR. The *Sp100* levels are indicated as relative to *Actb*. **(B)** siRNA-transfected cells were sensitized with mouse anti-DNP-IgE mAb (1  $\mu\text{g}/\text{mL}$ ) overnight, then stimulated with DNP-HSA (10  $\text{ng}/\text{mL}$ ) for 1 hour. Histamine content in cell lysates and culture supernatants was determined by ELISA. Histamine release rates are indicated as % release (supernatants) out of total histamine contents of the cells (cell lysate plus supernatant). **(C to E)** siRNA-transfected cells were stimulated as in **(B)** but for 6 hours. The levels of IL-4 **(C)**, IL-6 **(D)** and IL-13 **(E)** in the culture supernatants were determined by ELISA. Each dot indicates different biological replicates. n=6 pooled from two independent experiments. P values were determined by paired Student's *t* test.
